# Supplementary material
Source: HighWire-hosted journal article supplement (https://ez-admanager.com/highwire/filestream/136442/field_highwire_adjunct_files/0/ronsin_912.pdf)
Supplement: ronsin_912.pdf [file ronsin_912.pdf]

# Presentación pseudotumoral de la angiopatía amiloide cerebral con inflamación asociada

Solène Ronsin, MD  
Gianluca Deiana, MD  
Ana Filipa Geraldo, MD  
Françoise Durand-  
Dubief, MD, PhD  
Laure Thomas-  
Maisonneuve, MD  
Maïté Formaglio, MD  
Virginie Desestret, MD,  
PhD  
David Meyronet, MD,  
PhD  
Norbert Nighoghossian,  
MD, PhD  
Yves Berthezène, MD,  
PhD  
Jérôme Honnorat, MD,  
PhD  
François Ducray, MD,  
PhD

## RESUMEN

**Objetivo:** Identificar las características clínicas y radiológicas que deberían despertar sospecha de una presentación pseudotumoral en la angiopatía amiloide cerebral con inflamación asociada (AAC-I).

**Métodos:** Revisamos retrospectivamente las características de 5 pacientes diagnosticados recientemente y 23 pacientes previamente reportados en quienes los hallazgos de imagen de AAC-I fueron inicialmente interpretados como neoplasias del SNC.

**Resultados:** La mayoría de los casos (85%) ocurrió en pacientes > 60 años de edad. Las características clínicas al momento de presentación incluyeron deterioro cognitivo subagudo (50%), confusión (32%), déficit focal (32%), convulsiones (25%) y cefaleas (21%). La RM de encéfalo demostró lesiones infiltrativas de la sustancia blanca que exhibieron un efecto de masa loco-regional sin realce parenquimatoso (93%). En general, estos hallazgos fueron interpretados como un glioma de bajo grado o un linfoma. A 18 pacientes (64%) se les realizó una biopsia, que no fue diagnóstica en 4 pacientes (14%), y a 6 pacientes (21%) se les realizó resección quirúrgica. La razón primaria para la mala interpretación de los hallazgos imagenológicos fue la ausencia de secuencias de T2\*-gradiente de eco (T2\*-GRE) en las imágenes iniciales (89%). Cuando se realizó subsecuentemente (39%), las secuencias T2\*-GRE demostraron múltiples microhemorragias corticales y subcorticales características. La RM de perfusión y la espectroscopia por resonancia magnética (ERM), que fueron realizadas en un subgrupo de pacientes, indicaron un flujo sanguíneo cerebral marcadamente reducido con un perfil metabólico normal.

**Conclusión:** La identificación de una o varias lesiones ocupantes de espacio que no realzan con contraste, especialmente en pacientes ancianos que se presentan con deterioro cognitivo, debería generar la sospecha de una presentación pseudotumoral de la AAC-I y llevar a la realización de secuencias T2\*-GRE. La RM de perfusión y la ERM parecen ser útiles para el diagnóstico diferencial de esta entidad. *Neurology*® 2016;86:912-919.

## GLOSARIO

**βA** = β-amiloide; **AAC** = angiopatía amiloide cerebral; **AAC-I** = AAC con inflamación asociada; **ARM** = angiografía por resonancia magnética; **DWI** = *diffusion-weighted imaging* (imagen de difusión); **ERM-1H** = espectroscopia por resonancia magnética protónica; **FLAIR** = *fluid-attenuated inversion recovery* (inversión recuperación con atenuación de fluidos); **FSCR** = flujo sanguíneo cerebral relativo; **SWI** = *susceptibility-weighted imaging* (imágenes con susceptibilidad magnética); **T2\*-GRE** = T2\*-gradiente de eco; **TTM** = tiempo de tránsito medio; **VSCR** = volumen sanguíneo cerebral relativo.

Correspondencia y solicitud de separatas al Dr. Honnorat: jérôme.honnorat@chu-lyon.fr

La angiopatía amiloide cerebral (AAC), una enfermedad frecuente de pequeños vasos del cerebro, está caracterizada por una deposición progresiva de proteína β-amiloide (βA) en las paredes de las arterias de pequeño a mediano calibre, arteriolas y capilares en la corteza cerebral y las leptomeninges suprayacentes.<sup>1</sup> La presentación típica de la AAC es la hemorragia intracerebral lobar espontánea en un paciente anciano. La AAC también puede manifestarse con deterioro cognitivo, demencia o síntomas neurológicos transitorios.<sup>1</sup> El T2\*-con gradiente de eco (T2\*-GRE) o las imágenes con susceptibilidad magnética (SWI) demuestran extensos microsangrados corticales y macrosangrados lobares. Una manifestación menos frecuente de la AAC es la AAC con inflamación asociada (AAC-I, también llamada angéitís asociada a βA).<sup>2-6</sup> Se piensa que la AAC-I es el resultado de una respuesta inflamatoria a la proteína βA en las paredes de los vasos sanguíneos. La AAC-I puede imitar clínica y radiológicamente a un tumor cerebral.<sup>7,8</sup> El objetivo de este estudio fue reportar 5 pacientes con una presen-

Del Neuro-oncology Department (S.R., L.T.-M., J.H., F.D.), Neuro-radiology Department (G.D., A.F.G., Y.B.), Neurology Department A (F.D.-D.), Neurology Department D (M.F., V.D.), Neuropathology Department (D.M.) y Stroke Unit (N.N.), Hôpital Neurologique, Hospices Civils de Lyon; Université de Lyon—Université Claude Bernard Lyon 1 (S.R., G.D., A.F.G., F.D.-D., L.T.-M., M.F., V.D., D.M., N.N., Y.B., J.H., F.D.), France; Neurology Department and Stroke Unit (G.D.), Ospedale San Francesco, Nuoro, Italy; y Lyon Neuroscience Research Center INSERM U1028/CNRS UMR 5292 (J.H., F.D.), France.

Ir a [Neurology.org](http://Neurology.org) para declaraciones de intereses completas. La información sobre fondos y aquellas declaraciones relevantes para los autores, si existiesen, se encuentran al final del artículo.

tación pseudotumoral de la AAC-I y revisar las características de 23 casos reportados previamente para identificar las características clínicas y radiológicas que deberían llevarnos a sospechar este diagnóstico.

**MÉTODOS** Revisamos retrospectivamente los registros médicos y radiológicos de 5 pacientes que fueron referidos a nuestro departamento de neuro-oncología entre 2008 y 2014 debido a la sospecha de un tumor cerebral y en quienes el diagnóstico final fue una presentación pseudotumoral de la AAC-I. Los criterios propuestos por Chung et al.<sup>7</sup> y los criterios de Boston modificados fueron utilizados para los diagnósticos de AAC-I y AAC.<sup>9</sup> Las imágenes de RM cerebral fueron revisadas por 2 neurorradiólogos independientes buscando la presencia y localización de hiperintensidades en el T2/inversión recuperación con atenuación de fluido (FLAIR), hipointensidades en T1, evidencia de hemorragia en el T2\*-GRE o SWI, la presencia de realce parenquimatoso o meníngeo post contraste y efectos de masa, como también anomalías en las imágenes de difusión (DWI), espectroscopia por resonancia magnética protónica (ERM-<sup>1</sup>H), RM de perfusión y angiografía por resonancia magnética (ARM). Los casos previamente reportados de AAC con hallazgos de imagen inicialmente interpretados como tumores cerebrales fueron identificados a través de búsquedas en PubMed desde enero de 1970 a septiembre de 2014 utilizando los términos AAC, AAC-asociada a inflamación, neoplasia y tumor cerebral. Recuperamos todos los artículos relevantes y chequeamos referencias adicionales citadas en estos artículos. Seleccionamos sólo los casos en los cuales estaban disponibles las descripciones de las RM.

**RESULTADOS Serie de casos actual.** Las características de nuestros 5 pacientes se presentan en la tabla 1. La mediana de la edad fue 70 años. Cuatro pacientes se presentaron con deterioro cognitivo subagudo, que estuvo asociado a cefaleas y edema de papila en un paciente y a hemiparesia progresiva en otro paciente. Un paciente se presentó con encefalopatía aguda. Todos los pacientes fueron referidos a nuestro departamento basados en una RM estándar inicial, que incluyó secuencias de T1 pre-contraste y post-contraste y T2/FLAIR, que mostraban hiperintensidades unilaterales (n = 1) o bilaterales (n = 4) asimétricas en T2/FLAIR en la sustancia blanca supratentorial con un efecto de masa loco-regional, sugiriendo el diagnóstico diferencial de un tumor cerebral (figura). En un caso, se observó compromiso del esplenio del cuerpo calloso. Luego de la inyección de gadolinio, no se detectó realce parenquimatoso. Se vio realce leptomeníngeo en 2 pacientes. Sobre la base de estos hallazgos iniciales, la sospecha diagnóstica fue de linfoma en 2 pacientes, glioma de bajo grado en 2 pacientes y gliomatosis cerebri en 1 paciente.

Todos los pacientes se realizaron RM multimodal subsecuentemente. Se identificaron micro-sangrados corticales y subcorticales extensos en el T2\*-GRE en todos los pacientes; estos micro-sangrados fueron predominantemente supratentoriales (figura). Se observó siderosis marginal en 4 pacientes. El DWI mostró áreas de difusión positivas que se correspondían a las anomalías de señal en T2/FLAIR. La RM de perfusión fue realizada en 3 pacientes y no reveló ningún signo de neoangiogénesis. Por otro lado, el volumen sanguíneo cerebral

relativo (VSCr), el flujo sanguíneo cerebral relativo (FSCr) y el tiempo de tránsito medio (TTM) estuvieron marcadamente reducidos en las anomalías de señal en T2/FLAIR en comparación con la sustancia blanca ipsilateral o contralateral aparentemente normal. Se realizó ERM-<sup>1</sup>H en 4 pacientes que indicó una razón metabólica normal y ausencia de otro pico patológico. La ARM también estuvo disponible en todos los casos y excluyó estenosis en los vasos intracraneales de tamaño mediano y grande. Se realizó PET fluorodesoxiglucosa en un paciente e indicó hipometabolismo en las áreas de señal aumentada en T2/FLAIR (paciente 3). El análisis de LCR demostró hiperproteorraquia aislada en 4 pacientes; el recuento celular fue normal en todos los pacientes y ninguno de los pacientes tuvo bandas oligoclonales.

Todos estos hallazgos fueron sugestivos de AAC-I tumefactiva. Todos los pacientes alcanzaron criterios para el diagnóstico de AAC-I probable de acuerdo a Chung et al.<sup>7</sup> En nuestro paciente índice (paciente 1), se realizó una biopsia cerebral y leptomeníngeo, que confirmó el diagnóstico, demostrando depósitos de amiloide en las leptomeninges y en los vasos corticales, asociado a focos de inflamación perivascular leve (figura). Las células inflamatorias perivasculares consistían principalmente en células monocíticas/microgliales (tinción para CD68). También había presentes linfocitos T (tinción para CD3), mientras que no se encontraron linfocitos B (tinción para CD20). No se realizó biopsia en los 4 pacientes subsecuentes. En 3 de ellos, sin embargo, el LCR fue analizado para péptidos  $\beta$ A 40 y 42, y se encontró bajo nivel de estos péptidos, como se observa típicamente en la AAC.<sup>10</sup> Dos de estos 3 pacientes fueron positivos para el genotipo *APOE*  $\epsilon$ 4/ $\epsilon$ 4. Cuatro pacientes (pacientes 1, 2, 3 y 4) fueron tratados con un curso corto de esteroides (2 mg/kg EV durante 3 días seguido de 1 mg/kg a reducir durante 4-6 semanas), que resultó en una rápida mejoría clínica en todos los pacientes. En 3 de estos pacientes (pacientes 2, 3 y 4), se realizó una RM 1 mes después del inicio del tratamiento y los resultados indicaron una resolución casi completa de las hiperintensidades tumefactivas en T2 (figura). Estos 3 pacientes se mantuvieron clínicamente estables luego de un seguimiento de 12 a 24 meses, y los hallazgos de imagen también se estabilizaron. El paciente 1 murió de una hemorragia lobar 3 meses después del diagnóstico. El paciente 5 no recibió esteroides y mejoró espontáneamente en 3 meses. En este paciente, la RM realizada 3 meses después del diagnóstico indicó una resolución casi completa de las hiperintensidades en T2 (figura).

**Análisis de las características de pacientes con una presentación pseudotumoral de la AAC-I.** Identificamos 23 pacientes previamente reportados con una presentación pseudotumoral de la AAC-I<sup>8,11-23</sup> (tabla e-1 en el sitio web de *Neurology*<sup>®</sup> en Neurology.org). En todos los pacientes, los hallazgos de imagen fueron inicialmente interpretados como una neoplasia del SNC, que llevó a la realización de una biopsia (n =

**Tabla 1** Características de nuestros 5 pacientes con una presentación pseudotumoral de la AAC-I

| Paciente | Edad, años/<br>sexo | Presentación clínica                         | Presentación radiológica                                                                             |        |                                               |                                               |                                                                                    | DWI | RM perfusión                                     | ARM | ERM- <sup>1</sup> H | Histología | Tratamiento                        | Evolución/<br>seguimiento |
|----------|---------------------|----------------------------------------------|------------------------------------------------------------------------------------------------------|--------|-----------------------------------------------|-----------------------------------------------|------------------------------------------------------------------------------------|-----|--------------------------------------------------|-----|---------------------|------------|------------------------------------|---------------------------|
|          |                     |                                              | T2/FLAIR                                                                                             | T1 Gd+ | T2*                                           | Microsangrados ST e IT, siderosis superficial | Lesiones múltiples, bilaterales, hiperintensas en sustancia blanca ST; asimétricas |     |                                                  |     |                     |            |                                    |                           |
| 1        | 70/M                | Confusión                                    | Lesiones múltiples, bilaterales, hiperintensas en sustancia blanca ST; asimétricas                   | RLC    | Microsangrados ST e IT, siderosis superficial | Difusión positiva                             | -                                                                                  | N   | -                                                | -   | Biopsia: AAC        | Esteroides | Favorable, pero murió (HC)/3 meses |                           |
| 2        | 80/M                | Deterioro cognitivo subagudo                 | Lesiones múltiples, bilaterales, hiperintensas en sustancia blanca ST; asimétricas                   | Sin RC | Microsangrados ST, siderosis superficial      | Difusión positiva                             | VSCr, FSCr y TTM reducidos                                                         | N   | NAA/Co >1,2; ausencia de pico de lactato/lípidos | -   | -                   | Esteroides | Favorable/12 meses                 |                           |
| 3        | 63/M                | Deterioro cognitivo subagudo y déficit motor | Lesiones aisladas, bilaterales, hiperintensas en sustancia blanca ST; compromiso del CC; asimétricas | Sin RC | Microsangrados ST e IT                        | Difusión positiva                             | VSCr, FSCr y TTM reducidos                                                         | N   | NAA/Co >1,2; ausencia de pico de lactato/lípidos | -   | -                   | Esteroides | Favorable/24 meses                 |                           |
| 4        | 82/M                | Deterioro cognitivo subagudo y cefaleas      | Lesión aislada, unilateral, hiperintensa en sustancia blanca ST; asimétrica                          | RLC    | Microsangrados ST, siderosis superficial      | Difusión positiva                             | VSCr, FSCr y TTM reducidos                                                         | N   | NAA/Co >1,2; ausencia de pico de lactato/lípidos | -   | -                   | Esteroides | Favorable/18 meses                 |                           |
| 5        | 63/M                | Deterioro cognitivo subagudo y cefaleas      | Lesiones confluentes, bilaterales, lesiones hiperintensas en sustancia blanca ST; asimétricas        | Sin RC | Microsangrados ST, siderosis superficial      | Difusión positiva                             | -                                                                                  | N   | NAA/Co >1,2; ausencia de pico de lactato/lípidos | -   | -                   | Ninguno    | Favorable/12 meses                 |                           |

Abreviaturas: AAC = angiopatía amiloide cerebral; AAC-I = angiopatía amiloide cerebral con inflamación relacionada; ARM = angiografía por resonancia magnética; CC = cuerpo calloso; Co = colina; DWI = imágenes de difusión; ERM-<sup>1</sup>H = espectroscopia por resonancia magnética protónica; FLAIR = inversión recuperación con atenuación de fluido; FSCr = flujo sanguíneo cerebral relativo; HIC = hemorragia intracerebral; IT = infratentorial; NNA = N-acetilaspartato; RC = realce con contraste; RLC = realce leptomeníngeo con contraste; ST = supratentorial; T1 Gd+ = T1 luego de inyección de gadolinio; TTM = tiempo de tránsito medio; VSCr = volumen sanguíneo cerebral relativo.

17 [74%]) o resección quirúrgica (n = 6 [26%]). Se realizaron T2\*-GRE o SWI antes de la cirugía en 2 pacientes y durante el seguimiento en 4 pacientes. Cuando estuvo especificado, los diagnósticos inicialmente sospechados incluyeron glioma de bajo grado, gliomatosis, linfoma o carcinomatosis meníngea. En 21 de los 23 pacientes, el diagnóstico final fue realizado luego del análisis histológico, que indicó AAC con (n = 12 [52%]) o sin (n = 9 [39%]) signos de inflamación vascular. En 4 pacientes la biopsia no fue diagnóstica, que llevó a repetirla en un paciente y a la resección quirúrgica en otro.<sup>8,22</sup> En los otros 2 pacientes, el diagnóstico fue hecho retrospectivamente cuando se observaron extensos microsangrados en el T2\*-GRE o SWI de las RM de seguimiento.<sup>8</sup>

Las características de los pacientes de nuestra serie junto con los casos previamente reportados se resumen en la tabla 2. La mayoría de los casos (n = 24 [85%]) ocurrieron en pacientes > 60 años. Dos pacientes tenían historia de hemorragia intracerebral. La presentación clínica no fue específica e incluyó una combinación variable de deterioro cognitivo subagudo (n = 14 [50%]), confusión (n = 9 [32%]), déficit focal (n = 10 [36%]), convulsiones (n = 7 [25%]) o cefaleas (n = 6 [21%]). De todas maneras, aproximadamente dos tercios de los pacientes exhibieron un deterioro cognitivo agudo o subagudo. La presentación radiológica fue similar entre los pacientes. Las secuencias de RM estándar demostraron hiperintensidades tumefactivas (n = 28 [100%]), aisladas (n = 22 [78%]) o múltiples (n = 6 [22%]) en T2/FLAIR sin realce parenquimatoso con contraste (n = 26 [93%]). El realce leptomeníngeo con contraste fue observado en 11 casos (28%). La razón primaria de la mala interpretación de los hallazgos en imagen de la AAC-I como una neoplasia del SNC fue la ausencia de secuencias de T2\*-GRE en las imágenes iniciales (n = 26 [89%]). Cuando se realizaron luego (n = 11 [39%]), estas secuencias demostraron múltiples hemorragias corticales y subcorticales características en todos los casos. Cuando estuvo disponible, las DWI y la ERM-<sup>1</sup>H no indicaron restricción en difusión y metabolismo normal, respectivamente. Luego del diagnóstico, 15 pacientes (57%) recibieron esteroides con o sin ciclofosfamida. La evolución fue favorable en 17 pacientes (60%). La tasa de evolución favorable fue 78% en los pacientes que recibieron esteroides con o sin ciclofosfamida y 58% en los pacientes que no recibieron tratamiento (Prueba exacta de Fisher, no significativa). Entre los 11 pacientes que se realizaron secuencias de T2\*-GRE, 5 pacientes alcanzaron criterios diagnósticos de AAC-I definitiva y 6 pacientes alcanzaron criterios de diagnóstico probable de AAC-I.<sup>7</sup> Todos estos pacientes alcanzaron los criterios diagnósticos de Boston modificados para AAC probable (5 pacientes con patología de apoyo y 6 pacientes sin ella).<sup>9</sup>

**DISCUSIÓN** La identificación de trastornos neurológicos intra-axiales, tumefactivos, no neoplásicos que pueden imitar tumores cerebrales es de gran importancia en el escenario preoperatorio.<sup>24</sup>



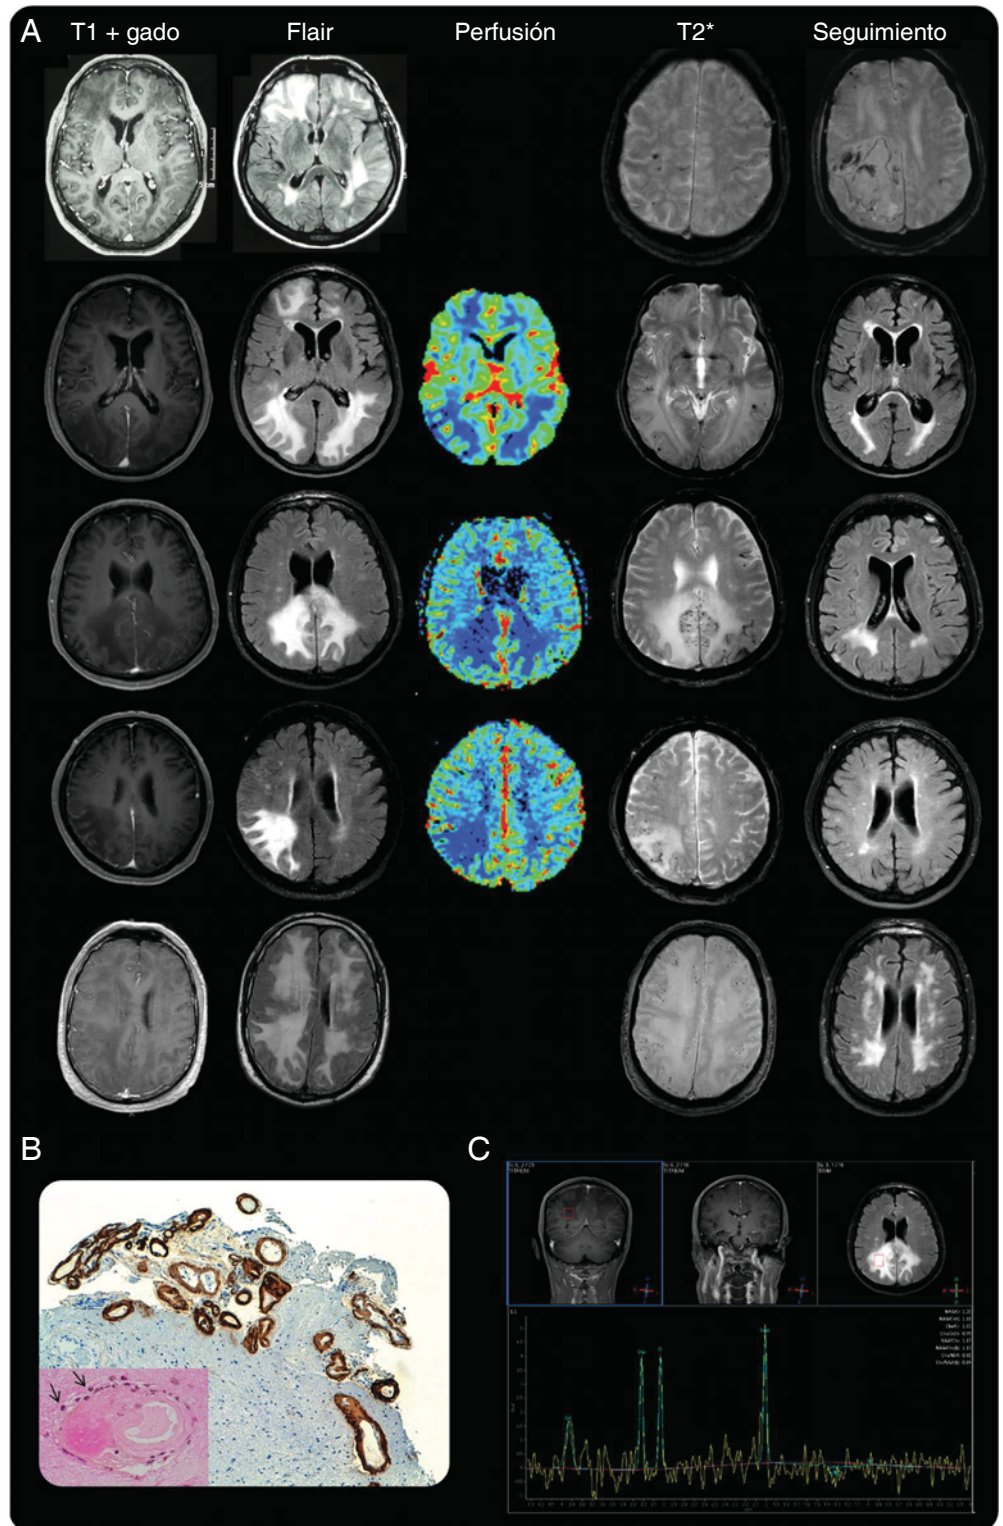

(A) Los hallazgos de RM del paciente 1 al paciente 5 están ordenados de arriba a abajo. Al momento del diagnóstico, las secuencias de T1 axial con gadolinio y la inversión recuperación con atenuación de fluidos (FLAIR) axial mostraron lesiones en sustancia blanca supratentorial con efecto de masa sin realce parenquimatoso con el contraste; estas lesiones estuvieron asociadas con múltiples microsangrados cerebrales en el T2\*-gradiente de eco. Las RM de perfusión en los pacientes 2, 3 y 4 mostraron un volumen sanguíneo cerebral relativamente marcadoamente reducido. En el seguimiento, el T2\* axial mostró un hematoma lobar agudo en el paciente 1, y el FLAIR axial mostró una marcada regresión de las lesiones hiperintensas en los pacientes 2 al 5. (B) La inmunomarcación para  $\beta$ -amiloide indicó depósitos de amiloide en los vasos leptomenigeos y corticales en el paciente 1 (baja magnificación,  $\times 100$ ). Esquina inferior izquierda: mínimos infiltrados inflamatorios (flechas) alrededor de un vaso marcadoamente engrosado con amiloide (alta magnificación,  $\times 400$ ). (C) La espectroscopia por resonancia magnética protónica en el paciente 3 demostró un espectro normal.

**Tabla 2 Resumen de las características de los 28 pacientes discutidos**

|                                                 | Serie de casos actual | Casos reportados previamente | Todos los casos |
|-------------------------------------------------|-----------------------|------------------------------|-----------------|
| <b>No.</b>                                      | 5                     | 23                           | 28              |
| <b>Edad, años, mediana (rango)</b>              | 70 (63-82)            | 64 (38-80)                   | 65 (38-82)      |
| <b>Edad &gt; 60 años, n (%)</b>                 | 5 (100)               | 19 (82)                      | 24 (85)         |
| <b>Razón de sexo, M/F</b>                       | 5/0                   | 10/13                        | 15/13           |
| <b>Características clínicas, n (%)</b>          |                       |                              |                 |
| <b>Cefaleas</b>                                 | 1 (20)                | 5 (22)                       | 6 (21)          |
| <b>Déficit focal</b>                            | 1 (20)                | 9 (39)                       | 10 (36)         |
| <b>Convulsiones</b>                             | 0                     | 7 (30)                       | 7 (25)          |
| <b>Deterioro cognitivo subagudo</b>             | 4 (80)                | 10 (43)                      | 14 (50)         |
| <b>Confusión</b>                                | 1 (20)                | 8 (35)                       | 9 (32)          |
| <b>Alteración cognitiva</b>                     | 5 (100)               | 13 (56)                      | 18 (64)         |
| <b>Características de RM, n (%)</b>             |                       |                              |                 |
| <b>Focal</b>                                    | 2 (40)                | 19 (83)                      | 21 (75)         |
| <b>Multifocal</b>                               | 3 (60)                | 4 (17)                       | 7 (25)          |
| <b>Señal hiperintensa T2/FLAIR</b>              | 5 (100)               | 23 (100)                     | 28 (100)        |
| <b>Realce con contraste</b>                     | 0                     | 2 (8)                        | 2 (7)           |
| <b>Realce leptomeníngeo con contraste</b>       | 2 (20)                | 7 (30)                       | 9 (32)          |
| <b>Microsangrados</b>                           | 5 (100)               | 6 (100)                      | 11 (100)        |
| <b>Difusión positiva</b>                        | 5 (100)               | 3 (100)                      | 8 (100)         |
| <b>Razón metabólica normal en ERM</b>           | 4 (100)               | 3 (100)                      | 7 (100)         |
| <b>Perfusión reducida en la RM de perfusión</b> | 3 (100)               | –                            | 3 (100)         |
| <b>Cirugía, n (%)</b>                           |                       |                              |                 |
| <b>Biopsia</b>                                  | 1 (20)                | 17 (74)                      | 18 (64)         |
| <b>Resección quirúrgica</b>                     | 0                     | 6 (26)                       | 6 (28)          |
| <b>Histología, n (%)</b>                        |                       |                              |                 |
| <b>AAC</b>                                      | 0                     | 9 (39)                       | 9 (32)          |
| <b>AAC e inflamación</b>                        | 1 (100)               | 12 (52)                      | 13 (68)         |
| <b>Tratamiento y evolución, n (%)</b>           |                       |                              |                 |
| <b>Ninguno</b>                                  | 1 (20)                | 11 (48)                      | 12 (43)         |
| <b>Esteroides</b>                               | 4 (80)                | 9 (39)                       | 13 (46)         |
| <b>Esteroides y ciclofosfamida</b>              | 0                     | 3 (13)                       | 3 (11)          |
| <b>Evolución favorable</b>                      | 3 (60)                | 14 (60)                      | 17 (60)         |

Abreviaturas: AAC = angiopatía amiloide cerebral; FLAIR = inversión recuperación con atenuación de fluidos; ERM = espectroscopia por resonancia magnética.

En este estudio demostramos que la AAC-I puede sugerir incorrectamente un tumor cerebral y que para identificar esta condición, debe realizarse un T2\*-GRE o SWI durante los estudios diagnósticos iniciales de las masas cerebrales, especialmente en pacientes ancianos que se presentan con un deterioro cognitivo subagudo y sin realce parenquimatoso con contraste. En centros que ya incluyen las secuencias de T2\*-GRE/SWI en sus protocolos de RM estándar, estas secuencias deberían ser activamente revisadas por los clínicos que evalúan pacientes con sospecha de tumores cerebrales. Los centros que no incluyen estas secuencias deberían considerar fuertemente el agregarlas.

Las presentaciones clínicas y radiológicas de la AAC-I tumefactiva no fueron específicas. Sin embargo, la mayoría de los pacientes fueron ancianos (85%) y exhibieron alteración cognitiva (65%) y lesiones hiperintensas en T2/FLAIR parcheadas o confluentes sin realce con contraste (93%). Los 2 diagnósticos más frecuentemente sospechados fueron el glioma de bajo grado y el linfoma. Sin

embargo, la edad avanzada al inicio, la alteración cognitiva y el extenso edema vasogénico son características inusuales en gliomas de bajo grado, mientras que la ausencia de realce con contraste es rara en los linfomas cerebrales. Por lo tanto, la AAC-I tumefactiva debería ser considerada como un diagnóstico diferencial ante la sospecha de glioma de bajo grado en pacientes ancianos y de linfoma sin realce con contraste. Menos frecuentemente, la AAC-I tumefactiva sugirió gliomatosis cerebri (debido a una leucoencefalopatía extensa) y carcinomatosis meníngea (debido al marcado realce leptomeníngeo con el contraste). El examen cuidadoso de las secuencias de FLAIR usualmente muestra un efecto de masa que fue menos pronunciado que en tumores cerebrales. Sin embargo, la razón primaria de la mala interpretación de los hallazgos de imagen de AAC-I como una neoplasia del SNC fue la ausencia de secuencias de T2\*-GRE/SWI en las imágenes iniciales. Cuando fueron realizadas luego, estas secuencias demostraron múltiples microsangrados corticales y subcorticales en todos

los casos; estos microsangrados fueron predominantemente supratentoriales. La siderosis marginal también fue frecuentemente identificada en base a estas secuencias. La RM de perfusión fue solo realizada en 3 pacientes; sin embargo, mostró de forma consistente una reducción en los parámetros principales de perfusión (VSCr, FSCr y TTM). Este hallazgo es interesante porque apoya los resultados de un estudio previo que utilizó PET-RM en un modelo de ratones, que mostró que la deposición de  $\beta$ A está acompañada por un decremento en el FSCr. En este modelo, la pérdida de perfusión se correlacionó con el aumento de placas  $\beta$ A, pero no con el número de microsangrados.<sup>25</sup> Por lo tanto, la RM de perfusión parece servir como una técnica prometedora para el diagnóstico e incluso el seguimiento de AAC-I. La ERM-<sup>1</sup>H no indicó ningún signo específico de AAC-I; sin embargo, facilitó la sospecha de un trastorno no neoplásico porque mostró un perfil metabólico normal. Además de los tumores cerebrales, los diagnósticos diferenciales de AAC-I incluyen infecciones (ej., leucoencefalopatía multifocal progresiva, enfermedad fúngica, tuberculosis, endocarditis infecciosa), trastornos inmuno-asociados (ej., encefalomiелitis aguda diseminada, neurosarcoidosis, vasculitis primaria del SNC) y leucoencefalopatía posterior reversible/síndrome de vasoconstricción reversible.<sup>6,7</sup>

Han sido reportadas lesiones ocupantes en aproximadamente un 15-25% de los pacientes con AAC-I.<sup>6,26</sup> Las características clínicas y radiológicas de los pacientes en nuestra serie fueron similares a aquellos reportados en AAC-I, excepto por el hecho de que en nuestra serie las lesiones parecieron ser más frecuentemente focales (75%) y más frecuentemente asociadas con un efecto de masa (100%).<sup>6,7</sup> Se piensa que la AAC-I es el resultado de una reacción inflamatoria e inmune dirigida contra los depósitos de  $\beta$ A en las paredes de los vasos sanguíneos.<sup>1</sup> Esta hipótesis es apoyada por los casos de meningoencefalitis subaguda que muestran características similares a la AAC-I en pacientes que recibieron vacunación contra la forma  $\beta$ A42 del  $\beta$ A o anticuerpos monoclonales anti-amiloide como una terapia potencial de la enfermedad de Alzheimer.<sup>27-30</sup> La reciente identificación de los autoanticuerpos anti- $\beta$ A en pacientes con AAC-I también apoya la hipótesis de una reacción autoinmune contra el  $\beta$ A cerebrovascular.<sup>31</sup> Han sido propuestos criterios diagnósticos para la AAC-I.<sup>7</sup> El diagnóstico de la AAC-I es considerado probable si se cumplen todos los siguientes criterios: (1) inicio agudo o subagudo de síntomas; (2) 40 años de edad o más; (3) al menos una de las siguientes características clínicas: cefalea, cambio en el estado mental o la conducta, signos neurológicos focales y convulsiones; (4) RM que muestra hiperintensidad parcheada o confluyente en T2 o FLAIR, típicamente asimétrica, con o sin efecto de masa y con o sin realce leptomeníngeo o parenquimatoso; (5) evidencia de AAC preexistente en SWI, como hemorragias corticales o subcorticales múltiples o microhemorragias o una hemorragia lobar reciente o previa; y

(6) ausencia de una causa neoplásica, infecciosa u otra, que justifique los síntomas. El diagnóstico de AAC-I es considerado definitivo si, además de estos criterios, un examen histopatológico indica inflamación perivascular, transmural o intramural, y depósitos de amiloide en los casos del área afectada en la corteza y las leptomeninges. La extensión de la inflamación es variable, desde una inflamación mínima perivascular no destructiva (como en el paciente 1) a una infiltración vasculítica transmural, granulomatosa.<sup>26</sup> Sin embargo, posiblemente debido al compromiso inflamatorio segmentario de los vasos cerebrales, los cambios inflamatorios no son siempre identificados, incluso en los casos típicos.<sup>26</sup>

La identificación de la AAC-I en un escenario preoperatorio es importante para evitar resecciones quirúrgicas sin sentido y biopsias no diagnósticas (28% y 14% de los pacientes del presente estudio, respectivamente). La confirmación histológica del diagnóstico requiere material tanto cortical como leptomeníngeo (de otra manera, la deposición de amiloide en los vasos podría no ser identificada). Aunque el diagnóstico definitivo puede ser solo logrado por un examen histopatológico, se ha propuesto que pacientes seleccionados con características típicas de AAC-I sin evidencia de otra causa de los síntomas, puedan ser tratados sin la realización de una biopsia cerebral.<sup>4,7</sup> Sin embargo, los microsangrados en T2\*-GRE no son específicos de la AAC-I y los criterios diagnósticos de AAC-I (especialmente la especificidad y sensibilidad de los hallazgos de imagen) todavía deben ser validados. Además, en una condición para la cual la historia natural todavía no se conoce bien, la falta de biopsia puede empobrecer el progreso hacia un entendimiento de la relación entre la AAC y la inflamación vascular.<sup>26</sup> En el futuro, el diagnóstico no invasivo de la AAC-I podría ser facilitado mediante la detección de autoanticuerpos anti  $\beta$ A en el LCR<sup>31</sup> y por el desarrollo de técnicas de PET<sup>32</sup> o RM<sup>33</sup> que permitan la visualización de los depósitos amiloides.

El tratamiento óptimo de la AAC-I todavía no fue definido.<sup>7</sup> Las respuestas clínicas y radiológicas rápidas se han visto con la utilización de esteroides solos o en conjunto con otras drogas inmunosupresoras como la ciclofosfamida.<sup>7</sup> Sin embargo, también se han reportado mejoras espontáneas. En la presente serie de casos, la tasa de evolución favorable tendió a ser mejor en los pacientes que recibieron esteroides (con o sin ciclofosfamida) que entre aquellos que no recibieron tratamiento (78% vs 58%). En nuestra experiencia, un curso corto de esteroides fue suficiente para lograr una mejoría clínica y radiológica rápida y persistente en 3 de nuestros 4 pacientes. De todas maneras, han sido reportadas recaídas luego de finalizado el tratamiento; por lo tanto, la duración óptima del tratamiento todavía debe ser determinada.<sup>7</sup>

Además del diseño retrospectivo y el tamaño de la muestra, las limitaciones de este estudio incluyen el número limitado de pacientes que recibieron técnicas de RM avanzadas y la ausencia de examen histológico en todos los pacientes.

## CONTRIBUCIONES DE LOS AUTORES

Dr. Ronsín: diseño y conceptualización del estudio, análisis e interpretación de datos. Dr. Deiana: adquisición, análisis e interpretación de datos. Dr. Geraldo: adquisición, análisis e interpretación de datos. Dr. Durand-Dubief: análisis e interpretación de datos. Dr. Thomas-Maisonneuve: adquisición, análisis e interpretación de datos. Dr. Formaglio: análisis e interpretación de datos. Dr. Desestret: adquisición, análisis e interpretación de datos. Pr. Nighoghossian: análisis e interpretación de datos, revisión del manuscrito en cuanto a su contenido intelectual. Pr. Berthezène: análisis e interpretación de datos, revisión del manuscrito en cuanto a su contenido intelectual. Pr. Honnorat: diseño y conceptualización del estudio, análisis e interpretación de datos, revisión del manuscrito en cuanto a su contenido intelectual. Dr. Ducray: diseño y conceptualización del estudio, análisis e interpretación de datos, revisión del manuscrito en cuanto a su contenido intelectual.

## FONDOS PARA EL ESTUDIO

Sin fondos reportados.

## DECLARACIÓN DE INTERESES

Los autores no reportan declaraciones relevantes al manuscrito. Ir a [Neurology.org](http://Neurology.org) para declaraciones completas.

Recibido el 10 de abril de 2015. Aceptado en su formato final el 9 de noviembre de 2015.

## BIBLIOGRAFÍA

1. Charidimou A, Gang Q, Werring DJ. Sporadic cerebral amyloid angiopathy revisited: recent insights into pathophysiology and clinical spectrum. *J Neurol Neurosurg Psychiatry* 2012;83:124–137.
2. Eng JA, Frosch MP, Choi K, Rebeck GW, Greenberg SM. Clinical manifestations of cerebral amyloid angiopathy-related inflammation. *Ann Neurol* 2004;55:250–256.
3. Scolding NJ, Joseph F, Kirby PA, et al. Abeta-related angiitis: primary angiitis of the central nervous system associated with cerebral amyloid angiopathy. *Brain* 2005;128:500–515.
4. Kinnecom C, Lev MH, Wendell L, et al. Course of cerebral amyloid angiopathy-related inflammation. *Neurology* 2007;68:1411–1416.
5. Salvarani C, Brown RD Jr, Calamia KT, et al. Primary central nervous system vasculitis: comparison of patients with and without cerebral amyloid angiopathy. *Rheumatology* 2008;47:1671–1677.
6. Danve A, Grafe M, Deodhar A. Amyloid beta-related angiitis: a case report and comprehensive review of literature of 94 cases. *Semin Arthritis Rheum* 2014;44:86–92.
7. Chung KK, Anderson NE, Hutchinson D, Synek B, Barber PA. Cerebral amyloid angiopathy related inflammation: three case reports and a review. *J Neurol Neurosurg Psychiatry* 2011;82:20–26.
8. Kotsenas AL, Morris JM, Wald JT, Parisi JE, Campeau NG. Tumefactive cerebral amyloid angiopathy mimicking CNS neoplasm. *AJR Am J Roentgenol* 2013;200:50–56.
9. Linn J, Halpin A, Demaerel P, et al. Prevalence of superficial siderosis in patients with cerebral amyloid angiopathy. *Neurology* 2010;74:1346–1350.
10. Verbeek MM, Kremer BP, Rikkert MO, Van Domburg PH, Skehan ME, Greenberg SM. Cerebrospinal fluid amyloid beta(40) is decreased in cerebral amyloid angiopathy. *Ann Neurol* 2009;66:245–249.
11. Karbowniczek A, Wierzba-Bobrowicz T, Mendel T, Nauman P. Cerebral amyloid angiopathy manifested as a brain tumour: clinical and neuropathological characteristics of two cases. *Folia Neuropathol* 2012;50:194–200.
12. Andrade GC, Silveira RL, Pinheiro N Jr, Rocha EM, Pittella JE. Cerebral amyloid angiopathy presenting as a brain tumor: case report [in Portuguese]. *Arq Neuropsiquiatr* 2006;64:153–156.
13. Safriel Y, Sze G, Westmark K, Baehring J. MR spectroscopy in the diagnosis of cerebral amyloid angiopathy presenting as a brain tumor. *AJNR Am J Neuroradiol* 2004;25:1705–1708.
14. Vandermissen B, Salmon I, Hildebrand J. Recurrent non-hemorrhagic mass lesion due to cerebral amyloid angiopathy. *J Neurol* 2003;250:239–240.
15. Tamargo RJ, Connolly ES Jr, McKhann GM, et al. Clinicopathological review: primary angiitis of the central nervous system in association with cerebral amyloid angiopathy. *Neurosurgery* 2003;53:136–143; discussion 143.
16. Schwab P, Lidov HG, Schwartz RB, Anderson RJ. Cerebral amyloid angiopathy associated with primary angiitis of the central nervous system: report of 2 cases and review of the literature. *Arthritis Rheum* 2003;49:421–427.
17. Oide T, Tokuda T, Takei Y, Takahashi H, Ito K, Ikeda S. Serial CT and MRI findings in a patient with isolated angiitis of the central nervous system associated with cerebral amyloid angiopathy. *Amyloid* 2002;9:256–262.
18. De Broucker T, Henin D, Claquin G, et al. Cerebral amyloid angiopathy presenting as a pseudotumor: 2 cases with spontaneously favorable outcomes [in French]. *Rev Neurol (Paris)* 2000;156:859–863.
19. Polivka M, Vallat AV, Woimant F, et al. Cerebral amyloid angiopathy (CAA) with presentation as a brain inflammatory pseudo-tumour. *Clin Exp Pathol* 1999;47:303–310.
20. Fountain NB, Eberhard DA. Primary angiitis of the central nervous system associated with cerebral amyloid angiopathy: report of two cases and review of the literature. *Neurology* 1996;46:190–197.
21. Ortiz O, Reed L. Cerebral amyloid angiopathy presenting as a nonhemorrhagic, infiltrating mass. *Neuroradiology* 1996;38:449–452.
22. Osumi AK, Tien RD, Felsberg GJ, Rosenbloom M. Cerebral amyloid angiopathy presenting as a brain mass. *AJNR Am J Neuroradiol* 1995;16:911–915.
23. Mandybur TI, Balko G. Cerebral amyloid angiopathy with granulomatous angiitis ameliorated by steroid-cytotoxic treatment. *Clin Neuropharmacol* 1992;15:241–247.
24. Omuro AM, Leite CC, Mokhtari K, Delattre JY. Pitfalls in the diagnosis of brain tumours. *Lancet Neurol* 2006;5:937–948.
25. Maier FC, Wehrl HF, Schmid AM, et al. Longitudinal PET-MRI reveals beta-amyloid deposition and rCBF dynamics and connects vascular amyloidosis to quantitative loss of perfusion. *Nat Med* 2014;20:1485–1492.
26. Salvarani C, Hunder GG, Morris JM, Brown RD Jr, Christianson T, Giannini C. Abeta-related angiitis: comparison with CAA without inflammation and primary CNS vasculitis. *Neurology* 2013;81:1596–1603.
27. Ferrer I, Boada Rovira M, Sanchez Guerra ML, Rey MJ, Costa-Jussa F. Neuropathology and pathogenesis of encephalitis following amyloid-beta immunization in Alzheimer's disease. *Brain Pathol* 2004;14:11–20.
28. Nicoll JA, Wilkinson D, Holmes C, Steart P, Markham H, Weller RO. Neuropathology of human Alzheimer disease after immunization with amyloid-beta peptide: a case report. *Nat Med* 2003;9:448–452.
29. Orgogozo JM, Gilman S, Dartigues JF, et al. Subacute meningoencephalitis in a subset of patients with AD after Abeta42 immunization. *Neurology* 2003;61:46–54.
30. Sperling R, Salloway S, Brooks DJ, et al. Amyloid-related imaging abnormalities in patients with Alzheimer's disease treated with bapineuzumab: a retrospective analysis. *Lancet Neurol* 2012;11:241–249.
31. Piazza F, Greenberg SM, Savoiardo M, et al. Anti-amyloid beta autoantibodies in cerebral amyloid angiopathy-related inflammation: implications for amyloid-modifying therapies. *Ann Neurol* 2013;73:449–458.
32. Baron JC, Farid K, Dolan E, et al. Diagnostic utility of amyloid PET in cerebral amyloid angiopathy-related symptomatic intracerebral hemorrhage. *J Cereb Blood Flow Metab* 2014;34:753–758.
33. Viola KL, Sbarboro J, Sureka R, et al. Towards non-invasive diagnostic imaging of early-stage Alzheimer's disease. *Nat Nanotechnol* 2015;10:91–98.
